# Supplementary material for: Prehistoric and technogenic loads of Hg in raised and blanket peats from the lower Amur River basin, eastern Asia
Source: Royal Society of Chemistry journal article supplement (doi:10.1039/d3em00008g), 2023-01-01

## Supplementary materials

**Supplementary Fig. 1.** Illustrative pictures of peat massifs investigated: (a) The Tyapka raised peatland, (b) The Gur blanket peatland.

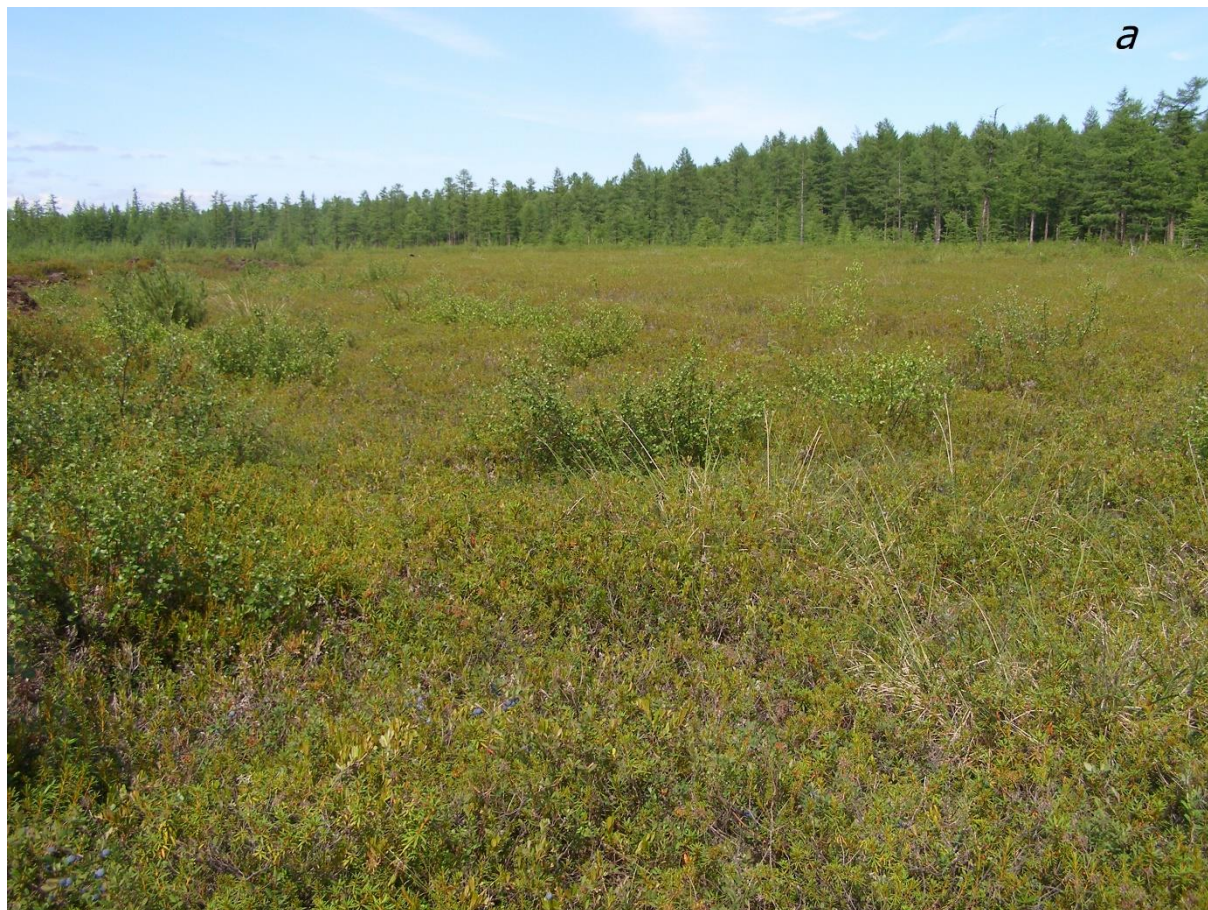

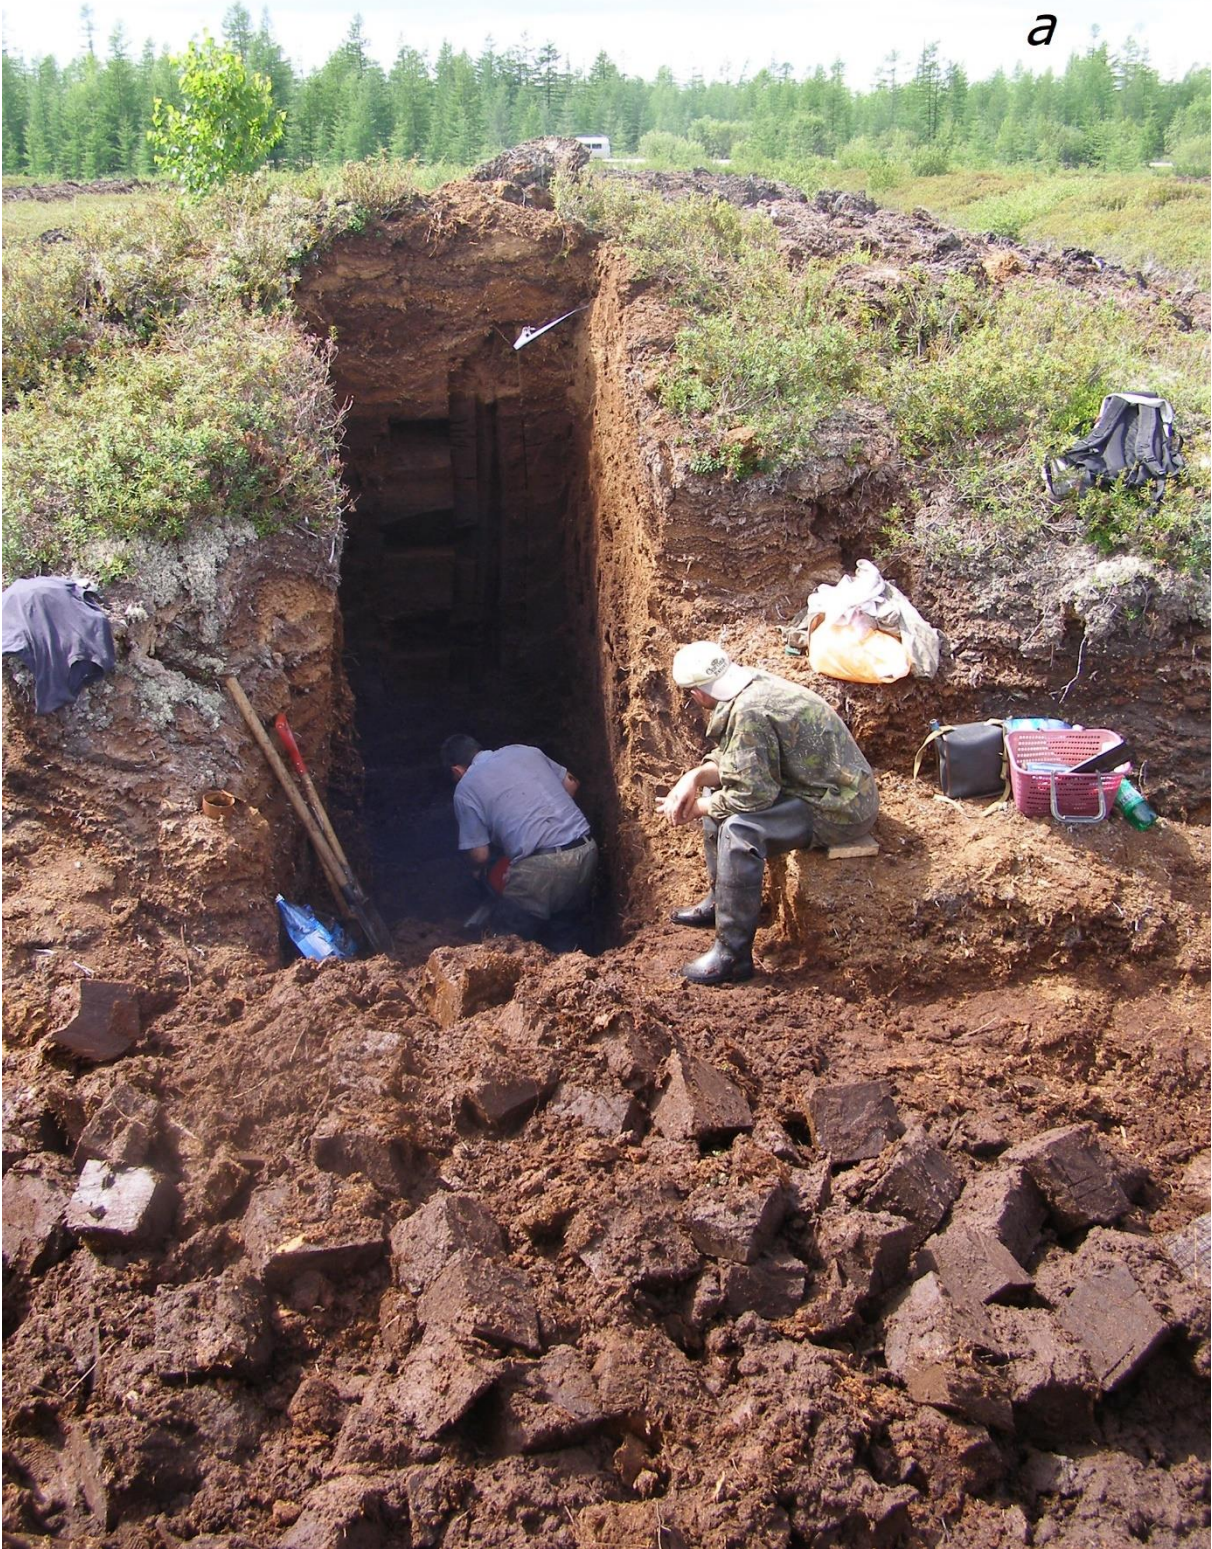

*a*

The Gur peatland

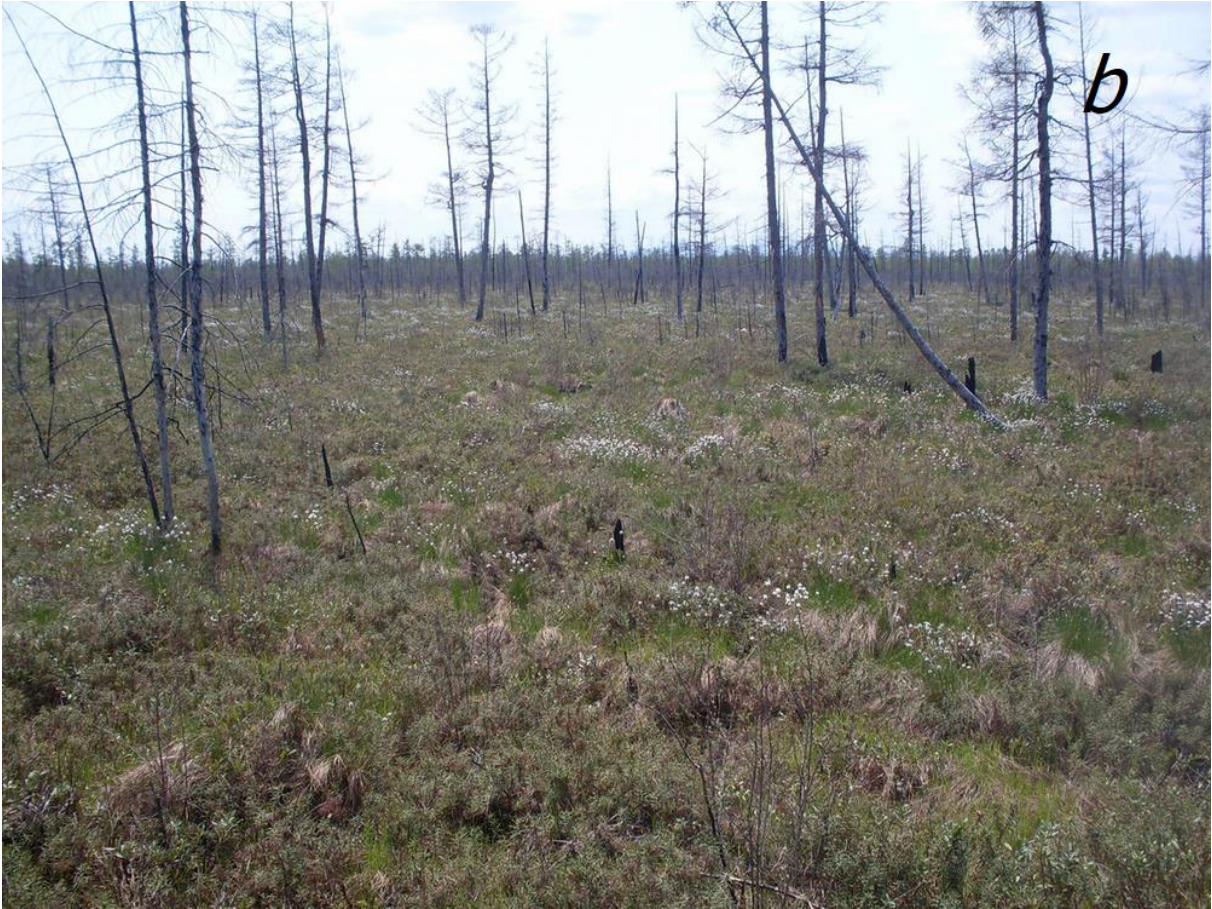

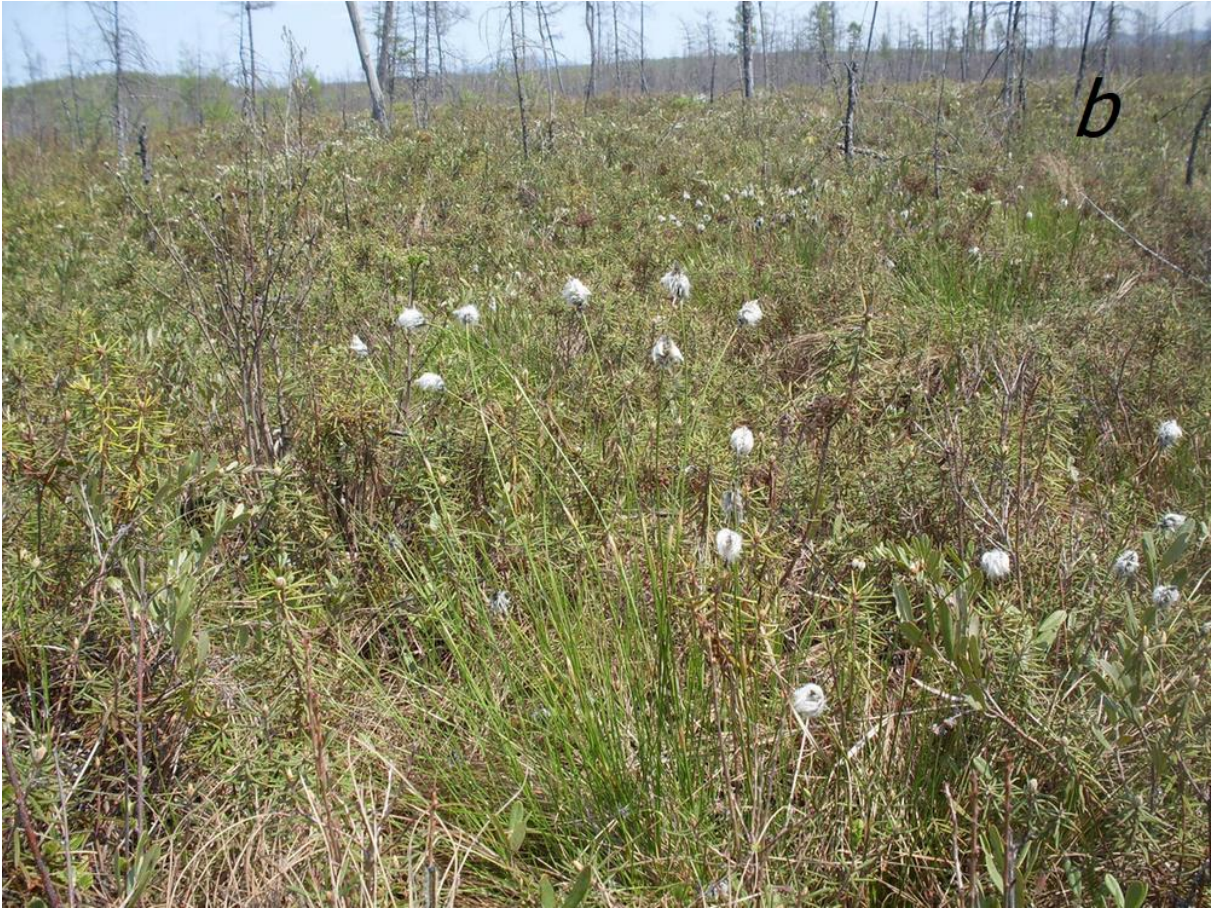

Supplement: d3em00008g1.pdf [file d3em00008g1.pdf]
