# Supplementary material for: Prehistoric and technogenic loads of Hg in raised and blanket peats from the lower Amur River basin, eastern Asia
Source: Royal Society of Chemistry journal article supplement (doi:10.1039/d3em00008g), 2023-01-01
Supplement: d3em00008g2.pdf [file d3em00008g2.pdf]

**Supplementary Fig. 2** Radiocarbon dates ( $^{14}\text{C}$  yr BP) calibrated with Bacon's method (Blaauw and Christen, 2011) to calendar years before present (cal yr BP) vs. peat depth for the Tyapka and Gur peat cores.

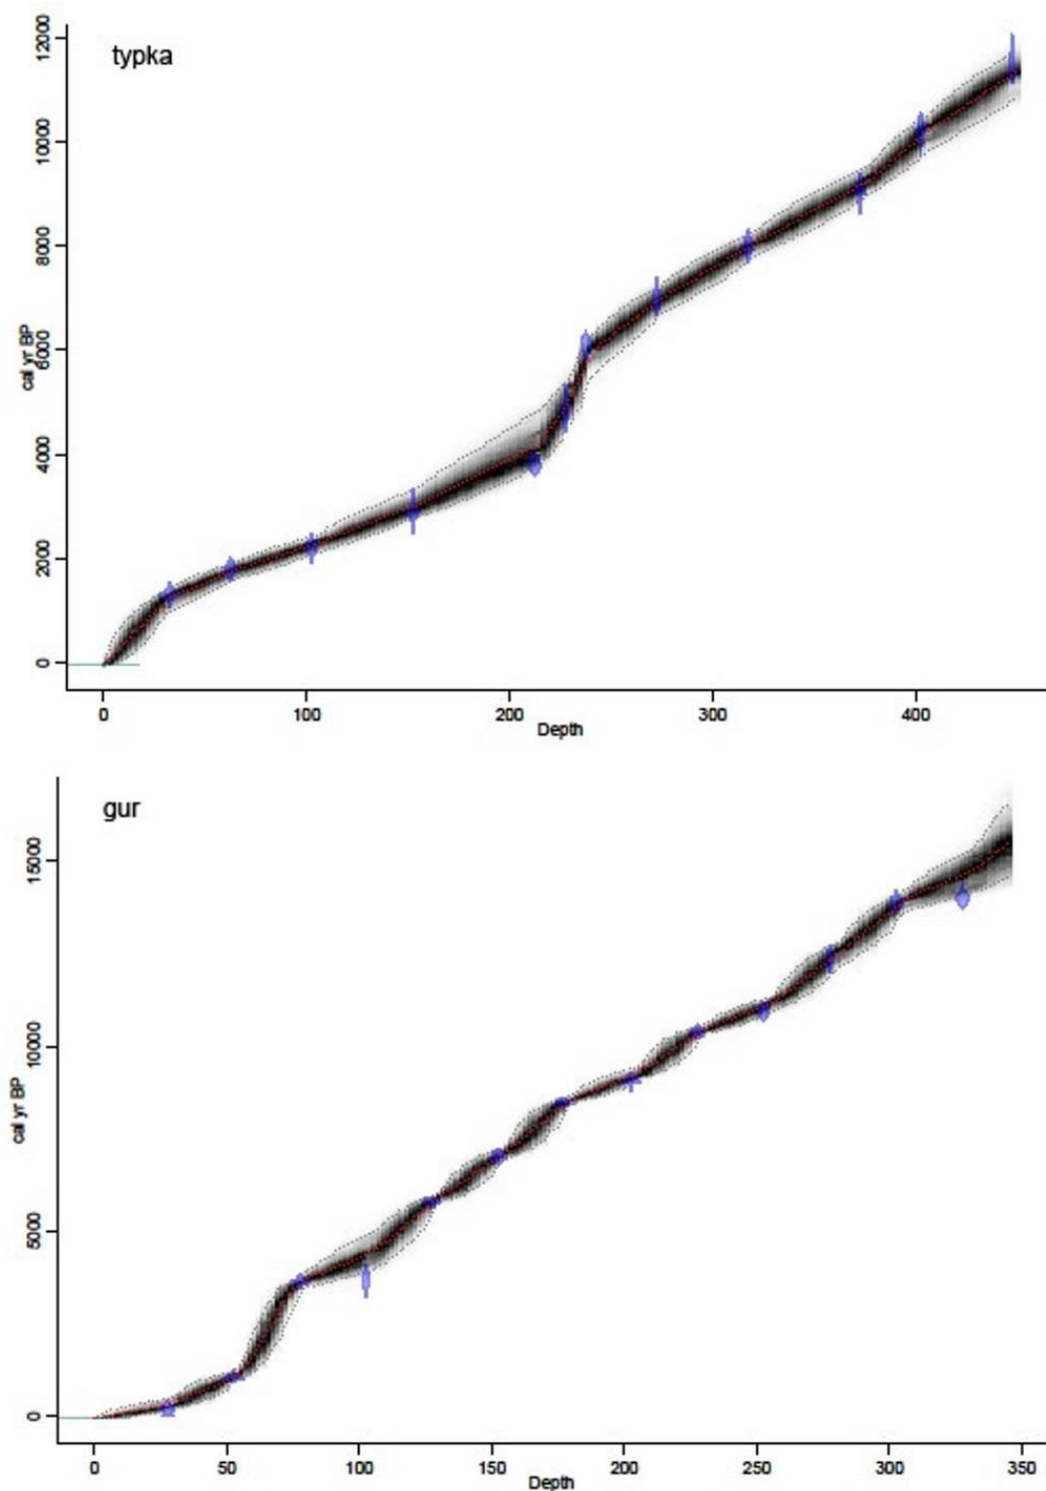

M. Blaauw and J. A. Christen, Flexible paleoclimate age-depth models using an autoregressive gamma process, *Bayesian Anal.*, 2011, **6**(3), 457–474.
