# Supplementary material for: Prehistoric and technogenic loads of Hg in raised and blanket peats from the lower Amur River basin, eastern Asia
Source: Royal Society of Chemistry journal article supplement (doi:10.1039/d3em00008g), 2023-01-01
Supplement: d3em00008g3.pdf [file d3em00008g3.pdf]

**Supplementary Table 3.** Co-relation between peaks in the Hg accumulation in the Gur blanket peat core and paleoclimatic events

| Peak  | Depth, cm | Time period, yr BP | Hg AR extreme value $\mu\text{g cm}^{-2} \text{yr}^{-1}$ | Climate                                           | Dominant vegetation in the lower Amur River basin (Bazarova et al., 2008)                  | Simultaneous geochemical factors     |
|-------|-----------|--------------------|----------------------------------------------------------|---------------------------------------------------|--------------------------------------------------------------------------------------------|--------------------------------------|
| Max 0 | (20-30)   | (Since 300)*       | 7.28                                                     |                                                   |                                                                                            | Most likely, anthropogenic pollution |
| Min 0 | 45-60     | (800-1600)*        | 1.95                                                     | Warm (Medieval Warm Period)                       | Broad-leave species (Quercus dominated, also Ulmus, Corylus, Juglans)                      |                                      |
| Min 1 | 110-125   | 4700-5650          | 2.38                                                     | Cold and dry; weakening of the East-Asian Monsoon | Shrub birch species, also Picea sect., Omorica, tree birch                                 |                                      |
| Max 1 | 155-185   | 7000-8700          | 11.9                                                     | Warm and wet (Holocene Climate Optimum)           | Broad-leave species (Quercus, Ulmus), also coniferous species (Abies, Picea sect. Omorica) | Fe/Mn accumulation                   |
| Min 2 | 190-205   | 8800-9200          | 3.91                                                     | Cold and dry; weakening of the East-Asian Monsoon | Shrub birch species                                                                        |                                      |
| Max 2 | 210-235   | 9500-10,600        | 12.0                                                     | Warming, wet                                      | Broad-leave species (Quercus dominated, also Ulmus and Juglans)                            | C <sub>org</sub> accumulation        |

\*Questionable accuracy of the radiocarbon dating for the top core.
