# Supplementary material for: Prehistoric and technogenic loads of Hg in raised and blanket peats from the lower Amur River basin, eastern Asia
Source: Royal Society of Chemistry journal article supplement (doi:10.1039/d3em00008g), 2023-01-01
Supplement: d3em00008g4.pdf [file d3em00008g4.pdf]

**Supplementary Table 1.** Raw data and calculated parameters for the blanket Gur peat core

| Depth, cm                 | Ash content, % | Bulk density, g cm <sup>-3</sup> | Hg, µg kg <sup>-1</sup> | Peat growth rate, mm yr <sup>-1</sup> | Hg AR, µg m <sup>-2</sup> yr <sup>-1</sup> | Arboreous pollen, % | Non-arboreous pollen, % | Spores, % | Fe, mg kg <sup>-1</sup> | Mn, mg kg <sup>-1</sup> |
|---------------------------|----------------|----------------------------------|-------------------------|---------------------------------------|--------------------------------------------|---------------------|-------------------------|-----------|-------------------------|-------------------------|
| <i>Living moss</i>        |                |                                  |                         |                                       |                                            |                     |                         |           |                         |                         |
| 0                         | 2.80           |                                  | 88                      |                                       |                                            |                     |                         |           |                         |                         |
| 5                         | 2.96           |                                  | 76                      |                                       |                                            |                     |                         |           |                         |                         |
| 10                        | 3.00           |                                  | 107                     |                                       |                                            |                     |                         |           |                         |                         |
| 15                        | 10.88          |                                  | 221                     |                                       |                                            |                     |                         |           |                         |                         |
| <i>Minerotrophic peat</i> |                |                                  |                         |                                       |                                            |                     |                         |           |                         |                         |
| 20                        | 20.72          | 0.147                            | 198                     | 88                                    | 7.28                                       | 36                  | 60                      | 4         | 7620                    | 69.69                   |
| 25                        | 17.76          | 0.147                            | 208                     | 76                                    | 6.88                                       | 37                  | 63                      | 0         | 5662                    | 61.33                   |
| 30                        | 15.64          | 0.174                            | 162                     | 107                                   | 5.64                                       | 60                  | 37                      | 3         | 3456                    | 53.87                   |
| 35                        | 18.52          | 0.174                            | 104                     | 221                                   | 3.17                                       | 49                  | 46                      | 5         | 3178                    | 60.65                   |
| 40                        | 14.36          | 0.194                            | 96                      | 198                                   | 2.79                                       | 68                  | 33                      | 0         | 2676                    | 54.22                   |
| 45                        | 21.60          | 0.194                            | 103                     | 208                                   | 2.50                                       | 25                  | 52                      | 23        | 2996                    | 59.2                    |
| 50                        | 24.20          | 0.205                            | 95                      | 162                                   | 1.95                                       | 53                  | 39                      | 8         | 2680                    | 54.92                   |
| 55                        | 23.60          | 0.205                            | 96                      | 104                                   | 2.16                                       | 48                  | 46                      | 6         | 2840                    | 57.99                   |
| 60                        | 26.48          | 0.214                            | 92                      | 96                                    | 2.36                                       | 47                  | 51                      | 2         | 3070                    | 60.8                    |
| 65                        | 24.80          | 0.214                            | 85                      | 103                                   | 2.36                                       | 55                  | 41                      | 4         | 2796                    | 56                      |
| 70                        | 24.76          | 0.205                            | 88                      | 95                                    | 2.53                                       | 59                  | 34                      | 7         | 2732                    | 53.85                   |
| 75                        | 24.20          | 0.205                            | 96                      | 96                                    | 2.95                                       | 34                  | 58                      | 9         | 2680                    | 50.65                   |
| 80                        | 18.08          | 0.215                            | 102                     | 92                                    | 3.51                                       | 66                  | 29                      | 5         | 2408                    | 45.09                   |
| 85                        | 21.68          | 0.215                            | 99                      | 85                                    | 3.62                                       | 63                  | 27                      | 11        | 2728                    | 50.91                   |
| 90                        | 20.32          | 0.222                            | 93                      | 88                                    | 3.72                                       | 70                  | 23                      | 7         | 2766                    | 49.93                   |
| 95                        | 20.86          | 0.222                            | 95                      | 96                                    | 4.01                                       | 60                  | 31                      | 9         | 2776                    | 45.83                   |
| 100                       | 21.40          | 0.269                            | 83                      | 102                                   | 4.47                                       | 58                  | 35                      | 7         | 3100                    | 47.63                   |
| 105                       | 23.72          | 0.269                            | 50                      | 99                                    | 2.61                                       | 63                  | 30                      | 7         | 2954                    | 47.86                   |
| 110                       | 21.12          | 0.229                            | 72                      | 93                                    | 3.10                                       | 57                  | 28                      | 16        | 2758                    | 46.41                   |
| 115                       | 20.72          | 0.229                            | 67                      | 95                                    | 2.79                                       | 58                  | 36                      | 6         | 3040                    | 48.37                   |
| 120                       | 21.44          | 0.215                            | 63                      | 83                                    | 2.38                                       | 59                  | 31                      | 10        | 2968                    | 48.26                   |
| 125                       | 18.20          | 0.215                            | 68                      | 50                                    | 2.49                                       | 61                  | 31                      | 7         | 3140                    | 51.35                   |
| 130                       | 22.60          | 0.258                            | 82                      | 72                                    | 4.13                                       | 64                  | 22                      | 14        | 3274                    | 49.56                   |
| 135                       | 19.56          | 0.258                            | 81                      | 67                                    | 4.60                                       | 63                  | 18                      | 19        | 3818                    | 53.53                   |
| 140                       | 23.36          | 0.198                            | 121                     | 63                                    | 5.87                                       | 64                  | 24                      | 12        | 3776                    | 50.19                   |

|                             |       |       |     |     |       |    |    |    |       |       |
|-----------------------------|-------|-------|-----|-----|-------|----|----|----|-------|-------|
| 145                         | 23.04 | 0.198 | 114 | 68  | 6.09  | 64 | 18 | 18 | 3822  | 52.24 |
| 150                         | 19.76 | 0.191 | 103 | 82  | 5.80  | 64 | 22 | 14 | 3378  | 48.3  |
| 155                         | 17.44 | 0.191 | 132 | 81  | 8.07  | 54 | 31 | 15 | 3572  | 50.45 |
| 160                         | 20.72 | 0.217 | 108 | 121 | 8.09  | 72 | 23 | 5  | 3796  | 52.36 |
| 165                         | 20.20 | 0.217 | 100 | 114 | 8.03  | 65 | 25 | 10 | 3758  | 52.36 |
| 170                         | 20.24 | 0.217 | 104 | 103 | 8.91  | 53 | 36 | 11 | 4502  | 55.94 |
| 175                         | 21.88 | 0.217 | 130 | 132 | 11.85 | 40 | 43 | 17 | 4196  | 54.16 |
| 180                         | 23.52 | 0.219 | 98  | 108 | 8.07  | 47 | 41 | 12 | 4702  | 58.3  |
| 185                         | 18.20 | 0.219 | 109 | 100 | 7.93  | 54 | 41 | 5  | 5294  | 58.83 |
| 190                         | 20.00 | 0.162 | 113 | 104 | 5.27  | 59 | 36 | 5  | 5396  | 59.97 |
| 195                         | 20.76 | 0.162 | 99  | 130 | 3.91  | 66 | 12 | 22 | 4666  | 58.12 |
| 200                         | 20.48 | 0.169 | 123 | 98  | 4.16  | 57 | 23 | 21 | 4478  | 56.77 |
| 205                         | 19.64 | 0.169 | 144 | 109 | 5.94  | 80 | 19 | 1  | 3758  | 47.68 |
| 210                         | 18.16 | 0.18  | 139 | 113 | 7.21  | 81 | 13 | 6  | 3938  | 49.53 |
| 215                         | 14.76 | 0.18  | 131 | 99  | 7.83  | 64 | 34 | 2  | 4310  | 52.74 |
| 220                         | 16.60 | 0.162 | 102 | 123 | 6.21  | 52 | 28 | 21 | 3790  | 48.17 |
| 225                         | 17.72 | 0.162 | 176 | 144 | 11.98 | 49 | 42 | 8  | 3378  | 43.49 |
| 230                         | 13.20 | 0.16  | 121 | 139 | 7.12  | 52 | 47 | 1  | 3358  | 42.15 |
| 235                         | 11.44 | 0.16  | 136 | 131 | 6.88  | 49 | 37 | 13 | 4158  | 50.56 |
| 240                         | 9.88  | 0.15  | 152 | 102 | 6.02  | 46 | 51 | 4  | 3940  | 50.34 |
| 245                         | 13.52 | 0.15  | 169 | 176 | 5.37  | 65 | 22 | 13 | 4314  | 51.3  |
| <i>Lacustrine sediments</i> |       |       |     |     |       |    |    |    |       |       |
| 250                         | 11.40 | 0.147 | 162 |     |       | 64 | 14 | 22 | 5160  | 56.59 |
| 255                         | 11.92 | 0.147 | 104 |     |       | 64 | 11 | 25 | 5964  | 59.91 |
| 260                         | 14.76 | 0.152 | 126 |     |       | 41 | 23 | 36 | 7626  | 67.58 |
| 265                         | 18.24 | 0.152 | 207 |     |       | 50 | 8  | 43 | 10458 | 90.25 |
| 270                         | 28.60 | 0.232 | 146 |     |       | 64 | 21 | 15 | 9238  | 90.37 |
| 275                         | 51.88 | 0.232 | 106 |     |       | 87 | 4  | 9  | 7732  | 76.22 |
| 280                         | 47.44 | 0.318 | 173 |     |       | 99 | 1  | 0  | 8240  | 83.33 |
| 285                         | 31.28 | 0.318 | 108 |     |       | 62 | 30 | 8  | 13218 | 117.6 |
| 290                         | 36.08 | 0.296 | 106 |     |       | 76 | 18 | 6  | 16394 | 136.2 |
| 295                         | 58.52 | 0.296 | 131 |     |       | 70 | 24 | 6  | 17306 | 141.3 |
| 300                         | 73.40 | 0.586 | 106 |     |       | 70 | 20 | 10 | 17010 | 145   |
| 305                         | 75.40 | 0.586 | 99  |     |       | 52 | 38 | 10 | 17844 | 149.8 |
| 310                         | 75.52 | 0.781 | 96  |     |       | 37 | 55 | 8  | 18030 | 151.8 |
| 315                         | 77.64 | 0.781 | 101 |     |       | 67 | 27 | 6  | 18832 | 151.8 |

|       |       |       |     |  |  |    |    |   |       |       |
|-------|-------|-------|-----|--|--|----|----|---|-------|-------|
| 320   | 77.12 | 0.736 | 149 |  |  | 59 | 35 | 6 | 13416 | 115.9 |
| 325   | 75.60 | 0.736 | 89  |  |  | 54 | 42 | 4 | 19396 | 152.8 |
| 327.5 | 39.12 | 0.736 | 149 |  |  | 57 | 43 | 0 | 20182 | 155.2 |
| 330   | 77.00 | 0.736 | 102 |  |  | 64 | 30 | 6 | 20482 | 161.9 |
| 335   | 80.72 | 0.695 | 113 |  |  | 75 | 17 | 8 | 3380  | 51.13 |
| 340   | 86.72 | 0.695 | 118 |  |  | 68 | 27 | 5 | 3336  | 52.33 |

**Supplementary Table 2.** Raw data and calculated parameters for the raised Tyapka peat core

| Depth, cm                 | Ash content, % | Bulk density, g cm <sup>-3</sup> | Hg, µg kg <sup>-1</sup> | Peat growth rate, mm yr <sup>-1</sup> | Hg AR, µg m <sup>-2</sup> yr <sup>-1</sup> |
|---------------------------|----------------|----------------------------------|-------------------------|---------------------------------------|--------------------------------------------|
| <i>Ombrotrophic peats</i> |                |                                  |                         |                                       |                                            |
| 0                         | 9.46           | 0.06                             | 202                     | 0.140                                 | 16.97                                      |
| 2                         | 3.25           | 0.06                             | 174                     | 0.140                                 | 14.60                                      |
| 4                         | 4.05           | 0.06                             | 119                     | 0.140                                 | 9.97                                       |
| 6                         | 3.08           | 0.06                             | 78                      | 0.139                                 | 6.52                                       |
| 8                         | 2.68           | 0.06                             | 69                      | 0.139                                 | 5.76                                       |
| 10                        | 2.47           | 0.11                             | 86                      | 0.139                                 | 13.15                                      |
| 12                        | 3.81           | 0.16                             | 62                      | 0.139                                 | 13.77                                      |
| 14                        | 1.45           | 0.16                             | 57                      | 0.139                                 | 12.64                                      |
| 16                        | 1.51           | 0.16                             | 62                      | 0.138                                 | 13.73                                      |
| 18                        | 1.76           | 0.16                             | 57                      | 0.138                                 | 12.60                                      |
| 20                        | 1.21           | 0.155                            | 63                      | 0.138                                 | 13.48                                      |
| 22                        | 1.52           | 0.15                             | 42                      | 0.138                                 | 8.68                                       |
| 24                        | 1.73           | 0.15                             | 29                      | 0.138                                 | 5.99                                       |
| 26                        | 2.01           | 0.15                             | 38                      | 0.137                                 | 7.83                                       |
| 28                        | 2.52           | 0.15                             | 38                      | 0.137                                 | 7.82                                       |
| 30                        | 1.55           | 0.15                             | 36                      | 0.137                                 | 7.40                                       |
| 32                        | 2.65           | 0.15                             | 39                      | 0.135                                 | 7.88                                       |
| 34                        | 2.09           | 0.15                             | 36                      | 0.133                                 | 7.16                                       |
| 36                        | 1.35           | 0.15                             | 44                      | 0.130                                 | 8.60                                       |
| 38                        | 1.17           | 0.15                             | 61                      | 0.128                                 | 11.72                                      |
| 40                        | 1.76           | 0.15                             | 51                      | 0.126                                 | 9.63                                       |
| 42                        | 2.27           | 0.15                             | 38                      | 0.124                                 | 7.05                                       |
| 44                        | 1.72           | 0.15                             | 47                      | 0.121                                 | 8.47                                       |
| 46                        | 1.34           | 0.10                             | 64                      | 0.119                                 | 7.63                                       |
| 48                        | 1.71           | 0.10                             | 48                      | 0.117                                 | 5.62                                       |
| 50                        | 1.30           | 0.10                             | 42                      | 0.115                                 | 4.82                                       |
| 52                        | 1.46           | 0.10                             | 32                      | 0.113                                 | 3.60                                       |
| 54                        | 1.57           | 0.10                             | 30                      | 0.110                                 | 3.31                                       |
| 56                        | 0.99           | 0.10                             | 38                      | 0.108                                 | 4.11                                       |
| 58                        | 1.22           | 0.10                             | 29                      | 0.106                                 | 3.02                                       |
| 60                        | 1.08           | 0.10                             | 41                      | 0.104                                 | 4.25                                       |

|     |      |      |    |       |      |
|-----|------|------|----|-------|------|
| 62  | 1.07 | 0.10 | 42 | 0.101 | 4.21 |
| 64  | 1.33 | 0.10 | 36 | 0.099 | 3.57 |
| 66  | 1.80 | 0.10 | 34 | 0.097 | 3.30 |
| 68  | 1.66 | 0.10 | 41 | 0.095 | 3.89 |
| 70  | 1.26 | 0.10 | 31 | 0.093 | 2.73 |
| 72  | 1.18 | 0.09 | 31 | 0.090 | 2.52 |
| 74  | 1.32 | 0.09 | 33 | 0.088 | 2.62 |
| 76  | 1.11 | 0.09 | 29 | 0.086 | 2.24 |
| 78  | 1.25 | 0.09 | 31 | 0.084 | 2.33 |
| 80  | 1.30 | 0.09 | 32 | 0.081 | 2.35 |
| 82  | 1.25 | 0.09 | 39 | 0.079 | 2.78 |
| 84  | 1.19 | 0.09 | 32 | 0.077 | 2.22 |
| 86  | 1.14 | 0.09 | 39 | 0.075 | 2.62 |
| 88  | 1.21 | 0.09 | 26 | 0.073 | 1.66 |
| 90  | 1.57 | 0.09 | 44 | 0.070 | 2.78 |
| 92  | 2.34 | 0.09 | 49 | 0.068 | 3.00 |
| 94  | 2.48 | 0.10 | 49 | 0.069 | 3.22 |
| 96  | 1.93 |      | 32 | 0.070 | 2.14 |
| 98  | 1.53 |      | 30 | 0.072 | 2.04 |
| 100 | 1.23 |      | 42 | 0.073 | 2.91 |
| 102 | 1.24 |      | 48 | 0.074 | 3.38 |
| 104 | 1.20 |      | 31 | 0.075 | 2.21 |
| 106 | 1.24 |      | 29 | 0.076 | 2.10 |
| 108 | 1.19 |      | 30 | 0.078 | 2.21 |
| 110 | 1.72 |      | 43 | 0.079 | 3.22 |
| 112 | 1.55 |      | 30 | 0.080 | 2.28 |
| 114 | 1.65 |      | 26 | 0.081 | 2.00 |
| 116 | 1.48 |      | 26 | 0.082 | 2.03 |
| 118 | 1.49 |      | 30 | 0.084 | 2.38 |
| 120 | 1.66 |      | 42 | 0.085 | 3.38 |
| 122 | 1.44 |      | 36 | 0.086 | 2.94 |
| 124 | 1.60 |      | 35 | 0.087 | 2.89 |
| 126 | 1.75 |      | 32 | 0.086 | 2.61 |
| 128 | 2.46 |      | 36 | 0.084 | 2.89 |
| 130 | 1.43 |      | 35 | 0.083 | 2.77 |
| 132 | 1.46 |      | 37 | 0.082 | 2.88 |
| 134 | 1.49 |      | 33 | 0.081 | 2.53 |

|     |      |  |    |       |      |
|-----|------|--|----|-------|------|
| 136 | 1.54 |  | 25 | 0.079 | 1.89 |
| 138 | 1.49 |  | 27 | 0.078 | 2.01 |
| 140 | 1.48 |  | 32 | 0.077 | 2.34 |
| 142 | 1.36 |  | 43 | 0.076 | 3.09 |
| 144 | 1.50 |  | 33 | 0.074 | 2.33 |
| 146 | 1.41 |  | 30 | 0.073 | 2.08 |
| 148 | 1.64 |  | 26 | 0.072 | 1.78 |
| 150 | 1.77 |  | 35 | 0.071 | 2.35 |
| 152 | 2.12 |  | 33 | 0.069 | 2.17 |
| 154 | 2.27 |  | 32 | 0.068 | 2.04 |
| 156 | 2.83 |  | 35 | 0.067 | 2.19 |
| 158 | 2.30 |  | 34 | 0.066 | 2.12 |
| 160 | 1.98 |  | 43 | 0.064 | 2.63 |
| 162 | 1.92 |  | 45 | 0.063 | 2.70 |
| 164 | 2.00 |  | 44 | 0.063 | 2.63 |
| 166 | 1.82 |  | 27 | 0.062 | 1.56 |
| 168 | 1.58 |  | 31 | 0.061 | 1.79 |
| 170 | 1.61 |  | 29 | 0.060 | 1.65 |
| 172 | 1.73 |  | 35 | 0.059 | 1.96 |
| 174 | 1.67 |  | 41 | 0.058 | 2.25 |
| 176 | 1.90 |  | 36 | 0.057 | 1.94 |
| 178 | 1.65 |  | 31 | 0.056 | 1.64 |
| 180 | 1.59 |  | 38 | 0.055 | 1.98 |
| 182 | 1.60 |  | 45 | 0.054 | 2.29 |
| 184 | 1.60 |  | 32 | 0.053 | 1.60 |
| 186 | 1.78 |  | 31 | 0.052 | 1.52 |
| 188 | 2.46 |  | 43 | 0.051 | 2.07 |
| 190 | 2.67 |  | 34 | 0.050 | 1.60 |
| 192 | 1.89 |  | 28 | 0.049 | 1.29 |
| 194 | 1.46 |  | 22 | 0.047 | 0.99 |
| 196 | 1.62 |  | 26 | 0.046 | 1.15 |
| 198 | 2.02 |  | 32 | 0.045 | 1.38 |
| 200 | 2.16 |  | 29 | 0.044 | 1.20 |
| 202 | 2.27 |  | 28 | 0.043 | 1.13 |
| 204 | 2.02 |  | 29 | 0.042 | 1.16 |
| 206 | 1.86 |  | 36 | 0.041 | 1.41 |
| 208 | 1.88 |  | 36 | 0.040 | 1.38 |

|     |      |  |     |       |      |
|-----|------|--|-----|-------|------|
| 210 | 1.76 |  | 35  | 0.039 | 1.30 |
| 212 | 1.76 |  | 33  | 0.038 | 1.20 |
| 214 | 2.01 |  | 76  | 0.037 | 2.66 |
| 216 | 2.05 |  | 27  | 0.036 | 0.93 |
| 218 | 2.03 |  | 18  | 0.035 | 0.60 |
| 220 | 2.08 |  | 22  | 0.034 | 0.71 |
| 222 | 1.96 |  | 31  | 0.033 | 0.97 |
| 224 | 1.90 |  | 34  | 0.032 | 1.03 |
| 226 | 1.81 |  | 31  | 0.031 | 0.91 |
| 228 | 1.88 |  | 28  | 0.030 | 0.80 |
| 230 | 1.89 |  | 30  | 0.029 | 0.83 |
| 232 | 2.04 |  | 27  | 0.028 | 0.70 |
| 234 | 2.37 |  | 26  | 0.027 | 0.65 |
| 236 | 2.22 |  | 29  | 0.026 | 0.72 |
| 238 | 2.37 |  | 37  | 0.025 | 0.87 |
| 240 | 1.98 |  | 23  | 0.024 | 0.52 |
| 242 | 2.11 |  | 24  | 0.023 | 0.52 |
| 244 | 2.10 |  | 35  | 0.022 | 0.73 |
| 246 | 2.26 |  | 24  | 0.021 | 0.48 |
| 248 | 2.17 |  | 36  | 0.020 | 0.68 |
| 250 | 1.82 |  | 32  | 0.019 | 0.58 |
| 252 | 2.14 |  | 34  | 0.020 | 0.63 |
| 254 | 2.27 |  | 32  | 0.020 | 0.61 |
| 256 | 2.40 |  | 148 | 0.021 | 2.88 |
| 258 | 2.02 |  | 104 | 0.021 | 2.07 |
| 260 | 2.12 |  | 104 | 0.022 | 2.12 |
| 262 | 2.02 |  | 64  | 0.022 | 1.34 |
| 264 | 1.69 |  | 55  | 0.023 | 1.18 |
| 266 | 1.75 |  | 40  | 0.023 | 0.87 |
| 268 | 2.19 |  | 35  | 0.024 | 0.78 |
| 270 | 2.13 |  | 36  | 0.024 | 0.82 |
| 272 | 2.14 |  | 40  | 0.026 | 0.98 |
| 274 | 2.03 |  | 50  | 0.027 | 1.30 |
| 276 | 2.06 |  | 35  | 0.029 | 0.96 |
| 278 | 2.10 |  | 30  | 0.031 | 0.87 |
| 280 | 2.03 |  | 31  | 0.032 | 0.95 |
| 282 | 1.95 |  | 26  | 0.034 | 0.84 |

|     |      |       |    |       |      |
|-----|------|-------|----|-------|------|
| 284 | 1.94 |       | 28 | 0.036 | 0.95 |
| 286 | 2.10 |       | 37 | 0.037 | 1.31 |
| 288 | 2.33 |       | 23 | 0.039 | 0.85 |
| 290 | 2.78 |       | 28 | 0.041 | 1.08 |
| 292 | 4.08 |       | 27 | 0.042 | 1.09 |
| 294 | 3.60 |       | 26 | 0.044 | 1.09 |
| 296 | 3.49 |       | 43 | 0.046 | 1.87 |
| 298 | 3.20 |       | 19 | 0.047 | 0.85 |
| 300 | 3.22 |       | 26 | 0.049 | 1.21 |
| 302 | 3.19 |       | 24 | 0.049 | 1.11 |
| 304 | 2.71 |       | 24 | 0.049 | 1.11 |
| 306 | 2.74 |       | 22 | 0.048 | 1.01 |
| 308 | 2.88 |       | 19 | 0.048 | 0.87 |
| 310 | 3.82 |       | 19 | 0.048 | 0.86 |
| 312 | 3.72 |       | 27 | 0.048 | 1.22 |
| 314 | 2.79 |       | 24 | 0.047 | 1.08 |
| 316 | 3.39 |       | 22 | 0.047 | 0.98 |
| 318 | 3.25 |       | 25 | 0.047 | 1.11 |
| 320 | 3.07 | 0.175 | 23 | 0.047 | 1.02 |
| 322 | 2.80 | 0.175 | 23 | 0.046 | 1.01 |
| 324 | 3.11 | 0.175 | 27 | 0.046 | 1.18 |
| 326 | 3.09 | 0.175 | 30 | 0.046 | 1.31 |
| 328 | 3.14 | 0.175 | 30 | 0.046 | 1.30 |
| 330 | 3.11 | 0.175 | 25 | 0.045 | 1.08 |
| 332 | 2.97 | 0.175 | 21 | 0.045 | 0.90 |
| 334 | 3.03 | 0.175 | 33 | 0.045 | 1.41 |
| 336 | 2.57 | 0.175 | 29 | 0.045 | 1.23 |
| 338 | 2.64 | 0.175 | 29 | 0.044 | 1.22 |
| 340 | 2.93 | 0.175 | 27 | 0.044 | 1.11 |
| 342 | 3.06 | 0.175 | 23 | 0.044 | 0.96 |
| 344 | 3.20 | 0.175 | 23 | 0.044 | 0.96 |
| 346 | 3.58 | 0.175 | 21 | 0.043 | 0.85 |
| 348 | 3.60 | 0.175 | 23 | 0.043 | 0.94 |
| 350 | 3.97 | 0.175 | 19 | 0.043 | 0.78 |
| 352 | 4.62 | 0.175 | 19 | 0.043 | 0.77 |
| 354 | 5.80 | 0.175 | 22 | 0.043 | 0.89 |
| 356 | 6.50 | 0.175 | 35 | 0.043 | 1.42 |



|                           |      |       |    |       |      |
|---------------------------|------|-------|----|-------|------|
| 358                       | 4.19 | 0.175 | 27 | 0.043 | 1.09 |
| 360                       | 3.61 | 0.175 | 23 | 0.043 | 0.93 |
| 362                       | 3.34 | 0.175 | 23 | 0.042 | 0.93 |
| 364                       | 3.35 | 0.175 | 26 | 0.042 | 1.02 |
| <i>Transitional peats</i> |      |       |    |       |      |
| 366                       | 3.05 | 0.175 | 23 | 0.042 | 0.92 |
| 368                       | 3.57 | 0.175 | 27 | 0.042 | 1.08 |
| 370                       | 3.25 | 0.175 | 21 | 0.042 | 0.84 |
| 372                       | 3.27 | 0.175 | 26 | 0.042 | 1.03 |
| 374                       | 3.30 | 0.175 | 22 | 0.042 | 0.87 |
| 376                       | 3.29 | 0.175 | 27 | 0.042 | 1.07 |
| 378                       | 3.39 | 0.175 | 27 | 0.042 | 1.07 |
| 380                       | 4.51 | 0.175 | 27 | 0.042 | 1.06 |
| 382                       | 4.41 | 0.215 | 27 | 0.041 | 1.06 |
| 384                       | 3.77 | 0.215 | 47 | 0.041 | 1.84 |
| 386                       | 3.96 | 0.215 | 20 | 0.041 | 0.78 |
| 388                       | 3.52 | 0.215 | 22 | 0.041 | 0.86 |
| 390                       | 3.75 | 0.215 | 34 | 0.041 | 1.32 |
| 392                       | 3.37 | 0.215 | 31 | 0.041 | 1.20 |
| 394                       | 3.39 | 0.215 | 20 | 0.041 | 0.78 |
| 396                       | 3.45 | 0.215 | 20 | 0.041 | 0.77 |
| 398                       | 4.01 | 0.215 | 11 | 0.041 | 0.42 |
| 400                       | 4.71 | 0.215 | 16 | 0.040 | 0.62 |
| 402                       | 4.97 | 0.215 | 13 | 0.040 | 0.50 |
| 404                       | 5.61 | 0.215 | 16 | 0.040 | 0.61 |
| 406                       | 6.63 | 0.215 | 14 | 0.040 | 0.53 |
| 408                       | 6.14 | 0.215 | 15 | 0.040 | 0.57 |
| 410                       | 7.90 | 0.215 | 13 | 0.04  | 0.49 |
| 412                       | 8.32 |       | 18 |       |      |
| 414                       | 5.17 |       | 16 |       |      |
| 416                       | 6.35 |       | 18 |       |      |
| 418                       | 5.94 |       | 11 |       |      |
| 420                       | 6.71 |       | 11 |       |      |
| 422                       | 7.38 |       | 15 |       |      |
| 424                       | 7.03 |       | 15 |       |      |
| 426                       | 8.26 |       | 14 |       |      |

|                            |       |  |    |  |  |
|----------------------------|-------|--|----|--|--|
| 428                        | 8.40  |  | 18 |  |  |
| <i>Mineratrophic peats</i> |       |  |    |  |  |
| 430                        | 10.50 |  | 20 |  |  |
| 432                        | 7.68  |  | 25 |  |  |
| 434                        | 7.97  |  | 56 |  |  |
| 436                        | 12.60 |  | 34 |  |  |
| 438                        | 9.01  |  | 71 |  |  |
| 440                        | 28.83 |  | 60 |  |  |
| 442                        | 11.54 |  | 54 |  |  |
